# Supplementary material for: Molecular dynamics simulations of the initial oxidation process on ferritic Fe–Cr alloy surfaces
Source: Royal Society of Chemistry journal article supplement (doi:10.1039/d1ra09329k), 2022-01-01
Supplement: d1ra09329k2.pdf [file d1ra09329k2.pdf]

# Electronic Supplementary Information of “Molecular dynamics simulations of the initial oxidation process on ferritic Fe-Cr alloy surface”

*Yuan-Shuo Zhang,<sup>a</sup> Bao-Shuai Chu,<sup>a,b</sup> Hong-Li Yu,<sup>a</sup> Kun Li,<sup>a</sup> Wei-Hua Wang,<sup>c</sup> Wen  
Yang<sup>\*a</sup>*

<sup>a</sup> Shanxi Key Laboratory of Metal Forming Theory and Technology, School of  
Material Science and Engineering, Taiyuan University of Science and Technology,  
Taiyuan 030024, Shanxi, P. R. China

<sup>b</sup> Technology Center, Taiyuan Iron & Steel (Group) Co., Taiyuan 030003, Shanxi, P.  
R. China

<sup>c</sup> Department of Electronic Science and Engineering, Key Laboratory of Photo-  
Electronic Thin Film Device and Technology of Tianjin, Nankai University, Tianjin  
300350, P. R. China

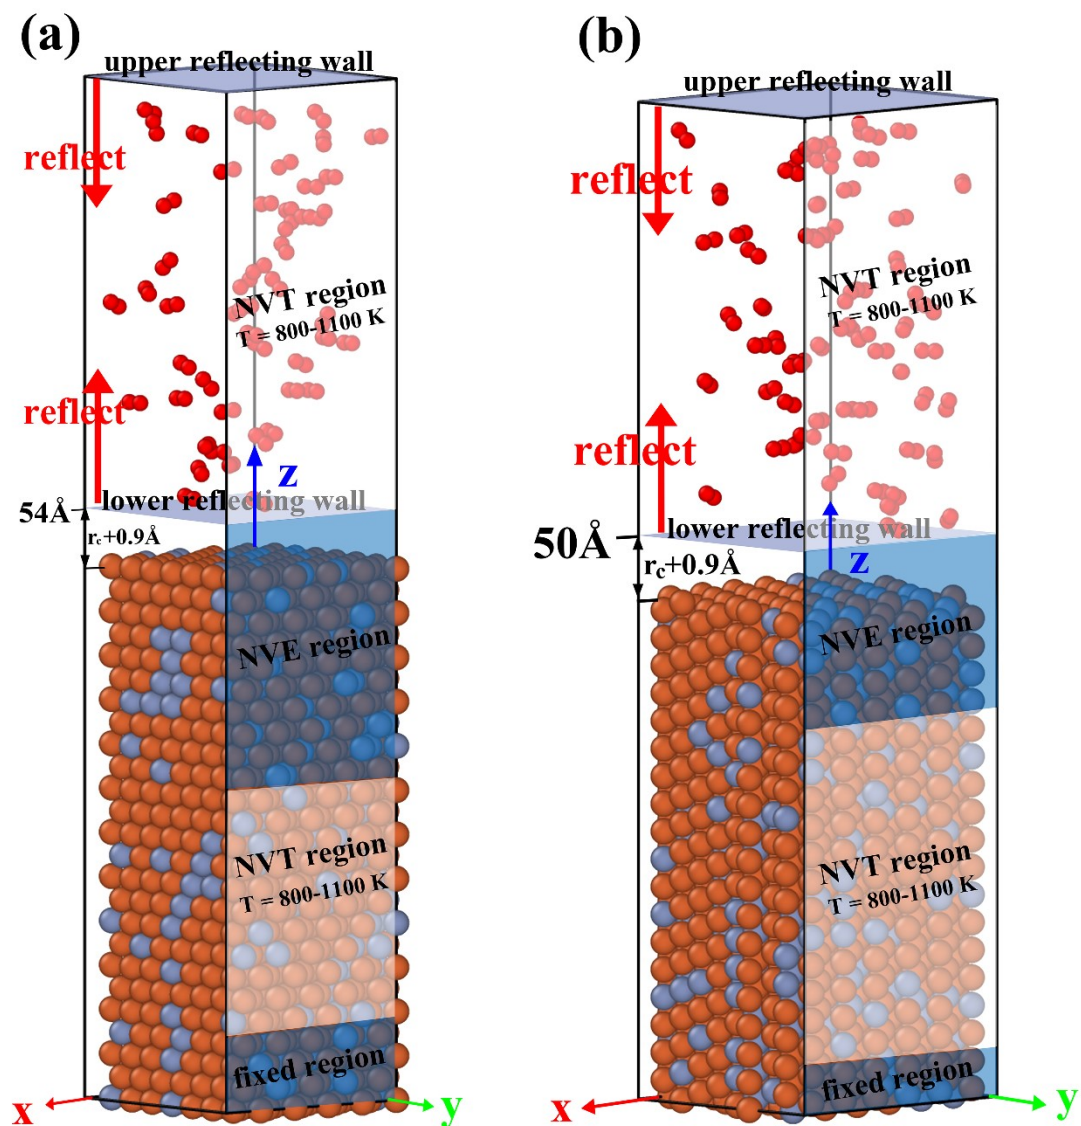

Fig. S1 MD models of Fe-Cr alloy surface with O<sub>2</sub> molecular layers (a) (110) surface (b)

(111) surface

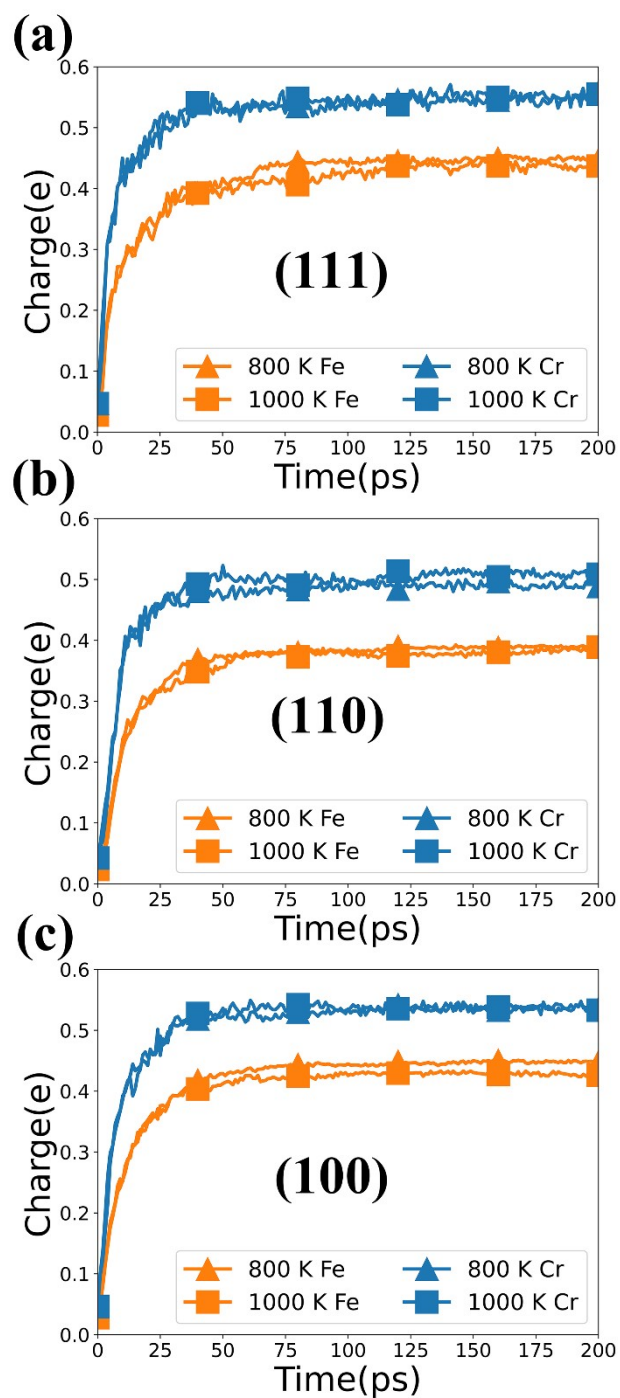

**Fig. S2 Average charge variation of Fe and Cr atoms versus time in three types of surfaces at**

**800 K, 1000 K and high O<sub>2</sub> concentration**

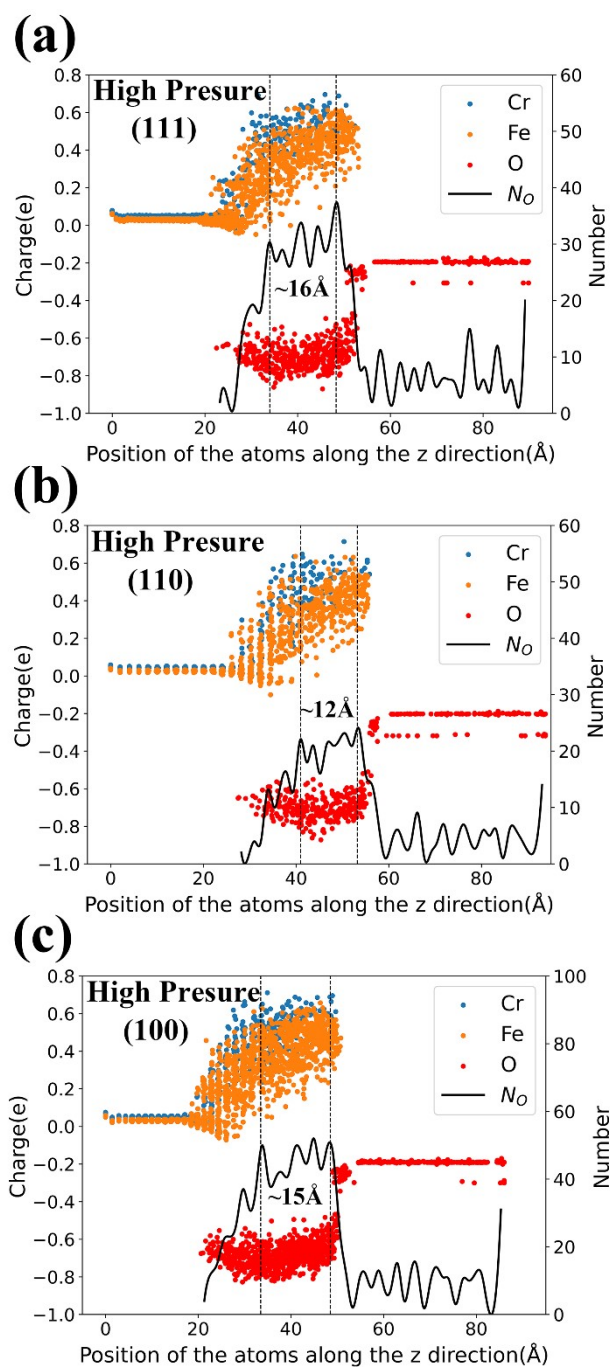

**Fig. S3 Left axis: Atomic charge distribution in Z direction of three types of surfaces at 200 ps, T=800 K and high O<sub>2</sub> concentration. Right axis: Corresponding number distribution of O atoms in Z direction**

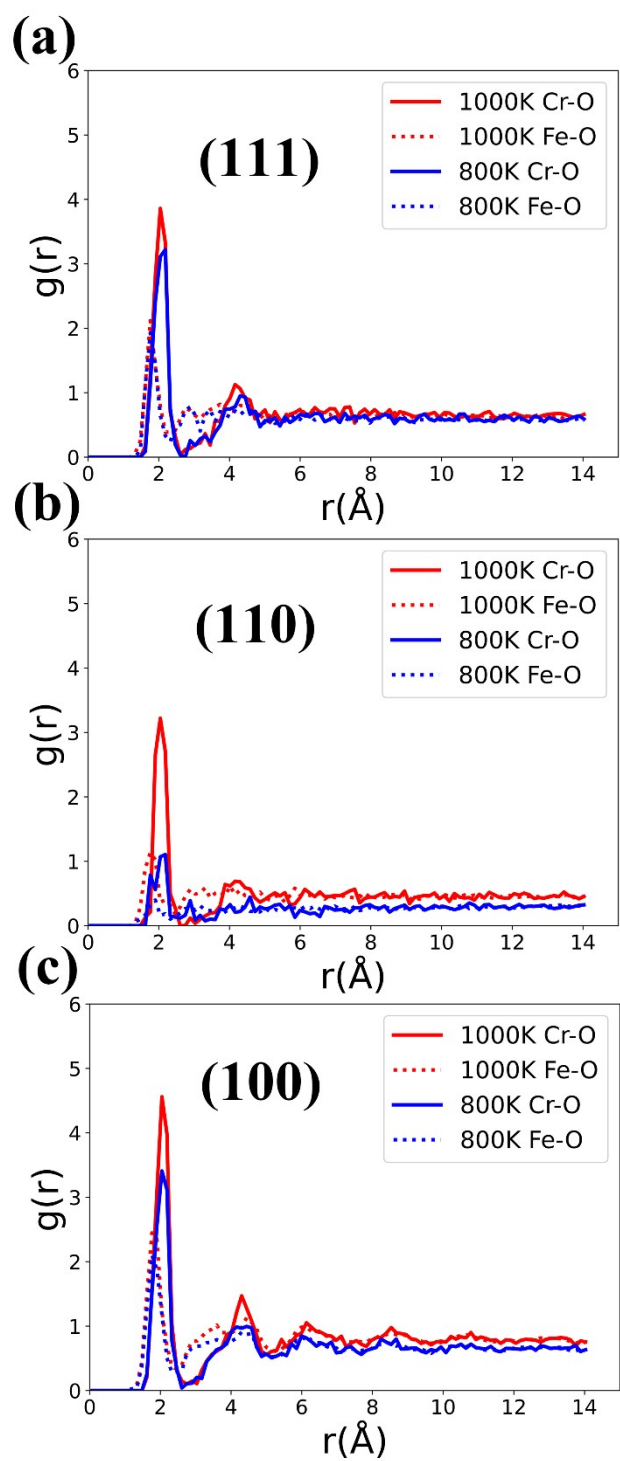

Fig. S4 RDF of Fe-O and Cr-O bonds in three types of surfaces at 800 K, 1000 K and

low  $O_2$  concentration
